# Supplementary material for: Fragment molecular orbital study of the cAMP-dependent protein kinase catalyzed phosphoryl transfer: a comparison with the differential transition state stabilization method
Source: Royal Society of Chemistry journal article supplement (doi:10.1039/c6cp02623k), 2016-01-01
Supplement: c6cp02623k1.pdf [file c6cp02623k1.pdf]

## Supplementary Information

### Fragment Molecular Orbital Study of the cAMP-Dependent Protein Kinase Catalyzed Phosphoryl Transfer: A Comparison with the Differential Transition State Stabilization Method

H. Öberg, T. Brinck

*Applied Physical Chemistry, KTH Royal Institute of Technology, Teknikringen 30, SE-100 44 Stockholm, Sweden*

#### Structures used in the FMO calculations:

##### Initial state

|   |           |           |           |
|---|-----------|-----------|-----------|
| H | 3.180000  | 10.170000 | 7.271000  |
| N | 4.076000  | 10.443000 | 7.701000  |
| H | 4.320000  | 9.696000  | 8.335000  |
| C | 5.051000  | 10.737000 | 6.642000  |
| H | 4.565000  | 11.294000 | 5.840000  |
| C | 6.222000  | 11.586000 | 7.180000  |
| H | 6.939000  | 11.753000 | 6.375000  |
| C | 5.777000  | 12.952000 | 7.703000  |
| H | 6.652000  | 13.553000 | 7.947000  |
| H | 5.210000  | 13.471000 | 6.931000  |
| H | 5.159000  | 12.840000 | 8.594000  |
| O | 6.874000  | 10.911000 | 8.238000  |
| H | 7.361000  | 11.593000 | 8.742000  |
| C | 5.602000  | 9.444000  | 6.036000  |
| O | 5.448000  | 8.356000  | 6.607000  |
| N | 6.281000  | 9.582000  | 4.901000  |
| H | 6.322000  | 10.506000 | 4.485000  |
| C | 7.115000  | 8.567000  | 4.258000  |
| H | 7.456000  | 7.835000  | 4.991000  |
| H | 6.539000  | 8.053000  | 3.496000  |
| C | 8.340000  | 9.218000  | 3.613000  |
| O | 8.737000  | 10.318000 | 4.007000  |
| N | 8.968000  | 8.550000  | 2.647000  |
| H | 8.598000  | 7.636000  | 2.390000  |
| C | 10.127000 | 9.075000  | 1.908000  |
| H | 10.916000 | 9.335000  | 2.614000  |
| C | 10.666000 | 8.004000  | 0.956000  |
| H | 9.835000  | 7.521000  | 0.440000  |
| H | 11.325000 | 8.462000  | 0.215000  |
| O | 11.403000 | 7.042000  | 1.679000  |
| H | 11.503000 | 6.264000  | 1.094000  |
| C | 9.827000  | 10.328000 | 1.080000  |
| O | 10.750000 | 11.103000 | 0.808000  |
| N | 8.571000  | 10.539000 | 0.671000  |
| H | 7.857000  | 9.872000  | 0.951000  |
| C | 8.221000  | 11.498000 | -0.381000 |
| H | 9.122000  | 12.011000 | -0.717000 |
| C | 7.663000  | 10.733000 | -1.593000 |
| H | 6.656000  | 10.384000 | -1.357000 |
| H | 7.578000  | 11.422000 | -2.436000 |
| C | 8.508000  | 9.542000  | -2.017000 |

|   |           |           |           |
|---|-----------|-----------|-----------|
| C | 9.754000  | 9.731000  | -2.641000 |
| H | 10.089000 | 10.732000 | -2.861000 |
| C | 10.559000 | 8.625000  | -2.977000 |
| H | 11.522000 | 8.771000  | -3.445000 |
| C | 10.107000 | 7.321000  | -2.706000 |
| H | 10.718000 | 6.467000  | -2.964000 |
| C | 8.858000  | 7.131000  | -2.090000 |
| H | 8.491000  | 6.140000  | -1.869000 |
| C | 8.070000  | 8.238000  | -1.733000 |
| H | 7.129000  | 8.082000  | -1.226000 |
| C | 7.256000  | 12.591000 | 0.087000  |
| O | 7.443000  | 13.746000 | -0.295000 |
| N | 6.254000  | 12.259000 | 0.911000  |
| H | 6.171000  | 11.280000 | 1.176000  |
| C | 5.193000  | 13.193000 | 1.315000  |
| H | 5.422000  | 14.199000 | 0.961000  |
| H | 4.266000  | 12.885000 | 0.832000  |
| C | 4.922000  | 13.294000 | 2.818000  |
| O | 5.518000  | 12.593000 | 3.644000  |
| H | 4.169000  | 14.013000 | 3.142000  |
| C | -0.340000 | 13.291000 | 5.232000  |
| H | -0.762000 | 13.810000 | 4.377000  |
| C | -0.743000 | 11.809000 | 5.112000  |
| H | -0.372000 | 11.263000 | 5.979000  |
| C | -2.269000 | 11.652000 | 5.040000  |
| H | -2.667000 | 12.219000 | 4.197000  |
| H | -2.525000 | 10.601000 | 4.912000  |
| H | -2.731000 | 12.001000 | 5.961000  |
| C | -0.163000 | 11.188000 | 3.837000  |
| H | 0.925000  | 11.165000 | 3.890000  |
| H | -0.516000 | 10.166000 | 3.726000  |
| H | -0.468000 | 11.761000 | 2.968000  |
| H | -0.732000 | 13.744000 | 6.137000  |
| H | 0.738000  | 13.419000 | 5.221000  |
| C | -1.440000 | 13.891000 | 1.181000  |
| H | -0.855000 | 13.775000 | 2.091000  |
| C | -1.259000 | 12.620000 | 0.324000  |
| H | -1.670000 | 11.776000 | 0.879000  |
| H | -1.819000 | 12.720000 | -0.606000 |
| C | 0.223000  | 12.322000 | 0.001000  |
| H | 0.590000  | 13.055000 | -0.718000 |
| H | 0.811000  | 12.409000 | 0.916000  |
| C | 0.425000  | 10.908000 | -0.572000 |
| H | 0.052000  | 10.186000 | 0.156000  |
| H | -0.147000 | 10.801000 | -1.496000 |
| C | 1.909000  | 10.613000 | -0.851000 |
| H | 2.282000  | 11.314000 | -1.603000 |
| H | 2.474000  | 10.762000 | 0.073000  |
| N | 2.115000  | 9.222000  | -1.321000 |
| H | 1.651000  | 9.051000  | -2.216000 |
| H | 3.103000  | 8.995000  | -1.430000 |
| H | 1.760000  | 8.563000  | -0.627000 |
| H | -2.480000 | 14.031000 | 1.448000  |
| H | -1.096000 | 14.779000 | 0.662000  |
| C | 9.354000  | 10.601000 | -8.675000 |
| H | 9.346000  | 9.561000  | -9.000000 |
| C | 8.923000  | 10.623000 | -7.192000 |
| H | 8.940000  | 11.650000 | -6.830000 |
| H | 7.899000  | 10.255000 | -7.115000 |
| C | 9.779000  | 9.781000  | -6.236000 |

|   |           |           |           |
|---|-----------|-----------|-----------|
| H | 10.748000 | 10.253000 | -6.106000 |
| H | 9.281000  | 9.776000  | -5.269000 |
| C | 9.949000  | 8.333000  | -6.683000 |
| O | 8.992000  | 7.571000  | -6.755000 |
| N | 11.146000 | 7.914000  | -7.033000 |
| H | 11.285000 | 6.955000  | -7.332000 |
| H | 11.927000 | 8.564000  | -6.982000 |
| H | 8.663000  | 11.167000 | -9.289000 |
| H | 10.353000 | 11.004000 | -8.815000 |
| C | -0.178000 | 7.928000  | -8.581000 |
| H | -0.320000 | 6.881000  | -8.308000 |
| C | 0.718000  | 8.570000  | -7.501000 |
| H | 1.680000  | 8.064000  | -7.538000 |
| H | 0.877000  | 9.622000  | -7.736000 |
| C | 0.167000  | 8.461000  | -6.067000 |
| H | -0.740000 | 9.063000  | -5.993000 |
| H | -0.105000 | 7.421000  | -5.880000 |
| C | 1.166000  | 8.916000  | -4.982000 |
| O | 2.318000  | 9.297000  | -5.306000 |
| O | 0.816000  | 8.851000  | -3.780000 |
| H | -1.159000 | 8.395000  | -8.641000 |
| H | 0.280000  | 7.971000  | -9.566000 |
| C | 4.735000  | -1.253000 | -2.206000 |
| H | 5.701000  | -1.715000 | -2.010000 |
| C | 4.930000  | 0.272000  | -2.102000 |
| H | 5.394000  | 0.739000  | -2.991000 |
| H | 3.978000  | 0.828000  | -1.957000 |
| C | 5.848000  | 0.677000  | -0.931000 |
| O | 6.406000  | -0.180000 | -0.215000 |
| O | 5.944000  | 1.939000  | -0.779000 |
| H | 4.352000  | -1.573000 | -3.180000 |
| H | 4.053000  | -1.603000 | -1.437000 |
| H | 3.153000  | -2.987000 | 2.679000  |
| H | 2.875000  | -2.722000 | 4.404000  |
| C | 3.586000  | -3.079000 | 3.668000  |
| H | 3.800000  | -4.131000 | 3.863000  |
| C | 4.940000  | -2.303000 | 3.768000  |
| H | 5.381000  | -2.404000 | 4.774000  |
| H | 5.693000  | -2.698000 | 3.060000  |
| C | 4.752000  | -0.820000 | 3.484000  |
| H | 4.327000  | -0.702000 | 2.477000  |
| H | 4.025000  | -0.403000 | 4.192000  |
| C | 6.060000  | -0.031000 | 3.563000  |
| H | 6.400000  | 0.037000  | 4.605000  |
| H | 6.820000  | -0.581000 | 3.004000  |
| C | 5.880000  | 1.347000  | 2.948000  |
| H | 5.576000  | 1.249000  | 1.907000  |
| H | 5.123000  | 1.927000  | 3.484000  |
| N | 7.108000  | 2.194000  | 2.903000  |
| H | 7.764000  | 1.896000  | 2.152000  |
| H | 6.799000  | 3.157000  | 2.598000  |
| H | 7.589000  | 2.237000  | 3.813000  |
| C | 0.842000  | 1.512000  | 3.523000  |
| H | 0.627000  | 2.582000  | 3.566000  |
| C | 1.603000  | 1.235000  | 2.206000  |
| H | 1.961000  | 0.206000  | 2.218000  |
| H | 0.905000  | 1.334000  | 1.375000  |
| C | 2.776000  | 2.143000  | 1.853000  |
| O | 3.000000  | 3.237000  | 2.372000  |
| N | 3.543000  | 1.716000  | 0.880000  |

|   |           |           |           |
|---|-----------|-----------|-----------|
| H | 4.335000  | 2.262000  | 0.553000  |
| H | 3.391000  | 0.793000  | 0.478000  |
| H | -0.082000 | 0.947000  | 3.543000  |
| H | 1.438000  | 1.251000  | 4.389000  |
| N | -1.081000 | 4.667000  | -0.610000 |
| H | -1.563000 | 5.489000  | -0.261000 |
| C | 0.254000  | 4.875000  | -1.187000 |
| H | 0.352000  | 5.945000  | -1.373000 |
| C | 1.322000  | 4.530000  | -0.146000 |
| H | 1.005000  | 4.914000  | 0.824000  |
| H | 1.402000  | 3.447000  | -0.067000 |
| C | 2.690000  | 5.121000  | -0.480000 |
| O | 2.966000  | 5.671000  | -1.565000 |
| O | 3.650000  | 5.067000  | 0.325000  |
| C | 0.468000  | 4.187000  | -2.548000 |
| O | 1.254000  | 3.250000  | -2.710000 |
| H | -0.128000 | 4.562000  | -3.381000 |
| H | -1.055000 | 3.984000  | 0.118000  |
| C | 5.012000  | 3.219000  | -7.368000 |
| H | 5.646000  | 3.828000  | -8.012000 |
| C | 5.914000  | 2.237000  | -6.616000 |
| H | 5.268000  | 1.542000  | -6.078000 |
| H | 6.489000  | 1.663000  | -7.343000 |
| C | 6.892000  | 2.835000  | -5.624000 |
| C | 7.439000  | 4.126000  | -5.779000 |
| H | 7.153000  | 4.758000  | -6.605000 |
| C | 8.356000  | 4.621000  | -4.834000 |
| H | 8.769000  | 5.615000  | -4.941000 |
| C | 8.710000  | 3.841000  | -3.721000 |
| H | 9.405000  | 4.227000  | -2.990000 |
| C | 8.146000  | 2.566000  | -3.558000 |
| H | 8.375000  | 1.961000  | -2.696000 |
| C | 7.274000  | 2.052000  | -4.525000 |
| H | 6.898000  | 1.046000  | -4.426000 |
| H | 4.305000  | 2.687000  | -7.994000 |
| H | 4.465000  | 3.868000  | -6.694000 |
| H | 13.116000 | 0.754000  | -6.676000 |
| N | 12.194000 | 0.536000  | -6.997000 |
| H | 12.185000 | -0.458000 | -7.175000 |
| C | 11.185000 | 1.033000  | -6.067000 |
| H | 11.664000 | 1.723000  | -5.372000 |
| C | 10.122000 | 1.814000  | -6.856000 |
| H | 9.350000  | 2.156000  | -6.171000 |
| H | 10.590000 | 2.697000  | -7.293000 |
| S | 9.376000  | 0.811000  | -8.179000 |
| H | 10.532000 | 0.375000  | -8.706000 |
| C | 10.581000 | -0.115000 | -5.234000 |
| O | 10.636000 | -1.285000 | -5.626000 |
| N | 10.006000 | 0.226000  | -4.082000 |
| H | 10.036000 | 1.206000  | -3.828000 |
| C | 9.470000  | -0.689000 | -3.067000 |
| H | 8.391000  | -0.555000 | -2.995000 |
| H | 9.670000  | -1.724000 | -3.338000 |
| C | 10.066000 | -0.414000 | -1.684000 |
| O | 10.648000 | 0.647000  | -1.458000 |
| N | 9.939000  | -1.367000 | -0.761000 |
| H | 9.454000  | -2.217000 | -1.039000 |
| C | 10.492000 | -1.290000 | 0.604000  |
| H | 11.043000 | -0.359000 | 0.702000  |
| C | 9.351000  | -1.229000 | 1.628000  |

|    |           |           |           |
|----|-----------|-----------|-----------|
| H  | 8.694000  | -2.091000 | 1.511000  |
| C  | 9.843000  | -1.166000 | 3.075000  |
| H  | 10.470000 | -0.286000 | 3.213000  |
| H  | 8.989000  | -1.095000 | 3.747000  |
| H  | 10.402000 | -2.066000 | 3.332000  |
| O  | 8.629000  | -0.035000 | 1.419000  |
| H  | 7.935000  | -0.192000 | 0.745000  |
| C  | 11.441000 | -2.475000 | 0.858000  |
| O  | 11.072000 | -3.600000 | 0.519000  |
| H  | 12.407000 | -2.325000 | 1.339000  |
| H  | 13.213000 | 2.346000  | 5.198000  |
| H  | 12.827000 | 2.152000  | 3.803000  |
| O  | 13.239000 | 1.624000  | 4.524000  |
| H  | -1.771000 | 7.447000  | 0.430000  |
| H  | -0.310000 | 7.811000  | 0.277000  |
| O  | -1.159000 | 7.801000  | -0.230000 |
| H  | 5.364000  | 11.652000 | -5.984000 |
| H  | 5.234000  | 10.185000 | -5.896000 |
| O  | 5.517000  | 10.937000 | -5.339000 |
| H  | 3.440000  | 9.339000  | -4.063000 |
| H  | 4.758000  | 10.014000 | -3.895000 |
| O  | 4.213000  | 9.337000  | -3.443000 |
| H  | 7.039000  | 5.147000  | 6.333000  |
| H  | 7.119000  | 3.797000  | 5.716000  |
| O  | 6.495000  | 4.540000  | 5.783000  |
| H  | 6.426000  | -1.857000 | 0.099000  |
| H  | 5.913000  | -3.194000 | 0.633000  |
| O  | 6.618000  | -2.825000 | 0.074000  |
| H  | 5.870000  | 6.890000  | -3.649000 |
| H  | 4.970000  | 7.806000  | -2.927000 |
| O  | 5.328000  | 6.885000  | -2.822000 |
| H  | 4.784000  | 3.628000  | -2.763000 |
| H  | 5.553000  | 3.313000  | -1.533000 |
| O  | 5.169000  | 4.112000  | -1.998000 |
| H  | 3.689000  | 5.236000  | 4.956000  |
| H  | 5.127000  | 4.878000  | 4.742000  |
| O  | 4.294000  | 5.020000  | 4.222000  |
| H  | 14.246000 | 6.901000  | -1.041000 |
| H  | 13.421000 | 6.069000  | -0.104000 |
| O  | 14.212000 | 6.648000  | -0.097000 |
| MG | 4.829000  | 5.902000  | -1.186000 |
| MG | 3.940000  | 5.001000  | 2.259000  |
| O  | 5.821000  | 4.388000  | 1.955000  |
| P  | 6.579000  | 5.641000  | 1.379000  |
| O  | 6.527000  | 5.720000  | -0.154000 |
| O  | 7.842000  | 6.021000  | 2.082000  |
| O  | 5.312000  | 6.775000  | 1.835000  |
| P  | 4.889000  | 8.149000  | 1.038000  |
| O  | 5.880000  | 9.254000  | 1.207000  |
| O  | 4.416000  | 7.756000  | -0.367000 |
| O  | 3.533000  | 8.521000  | 1.906000  |
| P  | 2.129000  | 7.677000  | 2.096000  |
| O  | 1.215000  | 7.875000  | 0.927000  |
| O  | 2.442000  | 6.244000  | 2.518000  |
| O  | 1.524000  | 8.467000  | 3.370000  |
| C  | 2.276000  | 8.485000  | 4.623000  |
| H  | 2.540000  | 9.550000  | 4.752000  |
| H  | 3.199000  | 7.909000  | 4.477000  |
| H  | 1.685000  | 8.102000  | 5.445000  |
| N  | 10.062000 | 4.099000  | 1.937000  |

|   |           |          |           |
|---|-----------|----------|-----------|
| H | 9.159000  | 4.543000 | 1.991000  |
| C | 10.370000 | 3.353000 | 0.707000  |
| H | 10.533000 | 2.310000 | 0.970000  |
| C | 9.133000  | 3.414000 | -0.188000 |
| H | 8.893000  | 4.450000 | -0.482000 |
| H | 9.301000  | 2.812000 | -1.093000 |
| O | 8.027000  | 2.893000 | 0.525000  |
| H | 7.308000  | 2.539000 | -0.066000 |
| C | 11.615000 | 3.854000 | -0.040000 |
| O | 12.028000 | 5.009000 | 0.111000  |
| H | 12.104000 | 3.166000 | -0.729000 |
| H | 10.166000 | 3.524000 | 2.745000  |

### Transition state

|   |           |           |           |
|---|-----------|-----------|-----------|
| H | 3.180000  | 10.170000 | 7.271000  |
| N | 4.067000  | 10.418000 | 7.664000  |
| H | 4.308000  | 9.672000  | 8.300000  |
| C | 5.027000  | 10.675000 | 6.582000  |
| H | 4.536000  | 11.219000 | 5.774000  |
| C | 6.220000  | 11.516000 | 7.082000  |
| H | 6.931000  | 11.648000 | 6.266000  |
| C | 5.808000  | 12.904000 | 7.575000  |
| H | 6.698000  | 13.492000 | 7.797000  |
| H | 5.248000  | 13.416000 | 6.794000  |
| H | 5.194000  | 12.828000 | 8.472000  |
| O | 6.871000  | 10.858000 | 8.152000  |
| H | 7.346000  | 11.549000 | 8.654000  |
| C | 5.555000  | 9.359000  | 6.005000  |
| O | 5.417000  | 8.294000  | 6.621000  |
| N | 6.203000  | 9.449000  | 4.848000  |
| H | 6.233000  | 10.352000 | 4.390000  |
| C | 7.040000  | 8.410000  | 4.246000  |
| H | 7.360000  | 7.693000  | 5.003000  |
| H | 6.479000  | 7.881000  | 3.484000  |
| C | 8.285000  | 9.038000  | 3.619000  |
| O | 8.733000  | 10.098000 | 4.065000  |
| N | 8.878000  | 8.392000  | 2.616000  |
| H | 8.467000  | 7.513000  | 2.306000  |
| C | 10.048000 | 8.928000  | 1.900000  |
| H | 10.824000 | 9.178000  | 2.624000  |
| C | 10.608000 | 7.874000  | 0.945000  |
| H | 9.789000  | 7.361000  | 0.438000  |
| H | 11.247000 | 8.348000  | 0.197000  |
| O | 11.384000 | 6.949000  | 1.676000  |
| H | 11.522000 | 6.173000  | 1.096000  |
| C | 9.772000  | 10.200000 | 1.091000  |
| O | 10.716000 | 10.946000 | 0.811000  |
| N | 8.518000  | 10.461000 | 0.706000  |
| H | 7.779000  | 9.819000  | 0.988000  |
| C | 8.189000  | 11.449000 | -0.326000 |
| H | 9.099000  | 11.961000 | -0.640000 |
| C | 7.636000  | 10.719000 | -1.561000 |
| H | 6.628000  | 10.364000 | -1.338000 |
| H | 7.555000  | 11.431000 | -2.384000 |
| C | 8.481000  | 9.540000  | -2.015000 |
| C | 9.740000  | 9.745000  | -2.608000 |
| H | 10.085000 | 10.752000 | -2.775000 |

|   |           |           |           |
|---|-----------|-----------|-----------|
| C | 10.541000 | 8.648000  | -2.980000 |
| H | 11.515000 | 8.808000  | -3.422000 |
| C | 10.071000 | 7.338000  | -2.781000 |
| H | 10.678000 | 6.492000  | -3.073000 |
| C | 8.808000  | 7.132000  | -2.198000 |
| H | 8.423000  | 6.135000  | -2.043000 |
| C | 8.027000  | 8.228000  | -1.797000 |
| H | 7.075000  | 8.062000  | -1.313000 |
| C | 7.230000  | 12.540000 | 0.156000  |
| O | 7.448000  | 13.708000 | -0.172000 |
| N | 6.194000  | 12.190000 | 0.928000  |
| H | 6.093000  | 11.201000 | 1.154000  |
| C | 5.125000  | 13.119000 | 1.317000  |
| H | 5.321000  | 14.112000 | 0.911000  |
| H | 4.192000  | 12.770000 | 0.874000  |
| C | 4.893000  | 13.283000 | 2.820000  |
| H | 4.150000  | 14.016000 | 3.133000  |
| O | 5.510000  | 12.616000 | 3.660000  |
| C | -0.346000 | 13.287000 | 5.233000  |
| H | -0.723000 | 13.849000 | 4.383000  |
| C | -0.747000 | 11.804000 | 5.121000  |
| H | -0.362000 | 11.259000 | 5.983000  |
| C | -2.273000 | 11.641000 | 5.068000  |
| H | -2.683000 | 12.208000 | 4.231000  |
| H | -2.526000 | 10.589000 | 4.942000  |
| H | -2.725000 | 11.987000 | 5.995000  |
| C | -0.183000 | 11.187000 | 3.838000  |
| H | 0.906000  | 11.175000 | 3.870000  |
| H | -0.527000 | 10.161000 | 3.736000  |
| H | -0.511000 | 11.753000 | 2.973000  |
| H | -0.747000 | 13.739000 | 6.135000  |
| H | 0.734000  | 13.402000 | 5.256000  |
| C | -1.428000 | 13.877000 | 1.167000  |
| H | -0.843000 | 13.767000 | 2.078000  |
| C | -1.233000 | 12.606000 | 0.312000  |
| H | -1.653000 | 11.761000 | 0.858000  |
| H | -1.777000 | 12.707000 | -0.628000 |
| C | 0.256000  | 12.308000 | 0.016000  |
| H | 0.641000  | 13.049000 | -0.686000 |
| H | 0.824000  | 12.382000 | 0.944000  |
| C | 0.469000  | 10.901000 | -0.572000 |
| H | 0.058000  | 10.174000 | 0.129000  |
| H | -0.067000 | 10.814000 | -1.519000 |
| C | 1.960000  | 10.585000 | -0.794000 |
| H | 2.376000  | 11.288000 | -1.520000 |
| H | 2.487000  | 10.711000 | 0.155000  |
| N | 2.162000  | 9.195000  | -1.269000 |
| H | 1.754000  | 9.040000  | -2.193000 |
| H | 3.150000  | 8.935000  | -1.296000 |
| H | 1.748000  | 8.544000  | -0.602000 |
| H | -2.469000 | 14.009000 | 1.433000  |
| H | -1.090000 | 14.767000 | 0.647000  |
| C | 9.358000  | 10.593000 | -8.675000 |
| H | 9.283000  | 9.593000  | -9.087000 |
| C | 8.930000  | 10.618000 | -7.191000 |
| H | 8.943000  | 11.646000 | -6.832000 |
| H | 7.907000  | 10.246000 | -7.112000 |
| C | 9.791000  | 9.783000  | -6.234000 |
| H | 10.759000 | 10.260000 | -6.108000 |
| H | 9.296000  | 9.780000  | -5.265000 |

|   |           |           |           |
|---|-----------|-----------|-----------|
| C | 9.966000  | 8.335000  | -6.677000 |
| O | 9.012000  | 7.571000  | -6.754000 |
| N | 11.165000 | 7.916000  | -7.023000 |
| H | 11.303000 | 6.958000  | -7.323000 |
| H | 11.945000 | 8.568000  | -6.971000 |
| H | 8.717000  | 11.243000 | -9.260000 |
| H | 10.382000 | 10.937000 | -8.800000 |
| C | -0.180000 | 7.950000  | -8.566000 |
| H | -0.296000 | 6.885000  | -8.376000 |
| C | 0.715000  | 8.608000  | -7.495000 |
| H | 1.685000  | 8.120000  | -7.545000 |
| H | 0.853000  | 9.663000  | -7.731000 |
| C | 0.186000  | 8.491000  | -6.052000 |
| H | -0.724000 | 9.087000  | -5.963000 |
| H | -0.078000 | 7.449000  | -5.865000 |
| C | 1.201000  | 8.947000  | -4.981000 |
| O | 2.343000  | 9.337000  | -5.327000 |
| O | 0.876000  | 8.874000  | -3.772000 |
| H | -1.178000 | 8.385000  | -8.588000 |
| H | 0.250000  | 8.063000  | -9.560000 |
| C | 4.753000  | -1.189000 | -2.171000 |
| H | 5.707000  | -1.675000 | -1.976000 |
| C | 4.986000  | 0.338000  | -2.062000 |
| H | 5.414000  | 0.802000  | -2.968000 |
| H | 4.048000  | 0.910000  | -1.885000 |
| C | 5.956000  | 0.738000  | -0.925000 |
| O | 6.404000  | -0.111000 | -0.125000 |
| O | 6.211000  | 1.991000  | -0.891000 |
| H | 4.365000  | -1.492000 | -3.143000 |
| H | 4.063000  | -1.527000 | -1.405000 |
| H | 3.114000  | -2.980000 | 2.673000  |
| H | 2.847000  | -2.731000 | 4.402000  |
| C | 3.549000  | -3.091000 | 3.660000  |
| H | 3.749000  | -4.144000 | 3.844000  |
| C | 4.914000  | -2.344000 | 3.766000  |
| H | 5.373000  | -2.490000 | 4.758000  |
| H | 5.650000  | -2.719000 | 3.029000  |
| C | 4.730000  | -0.854000 | 3.546000  |
| H | 4.264000  | -0.693000 | 2.563000  |
| H | 4.042000  | -0.453000 | 4.300000  |
| C | 6.050000  | -0.092000 | 3.601000  |
| H | 6.446000  | -0.088000 | 4.624000  |
| H | 6.769000  | -0.615000 | 2.964000  |
| C | 5.853000  | 1.314000  | 3.071000  |
| H | 5.459000  | 1.271000  | 2.058000  |
| H | 5.171000  | 1.906000  | 3.688000  |
| N | 7.111000  | 2.109000  | 2.948000  |
| H | 7.756000  | 1.673000  | 2.270000  |
| H | 6.817000  | 3.046000  | 2.561000  |
| H | 7.597000  | 2.217000  | 3.852000  |
| C | 0.865000  | 1.546000  | 3.527000  |
| H | 0.483000  | 2.558000  | 3.572000  |
| C | 1.629000  | 1.305000  | 2.202000  |
| H | 1.997000  | 0.280000  | 2.191000  |
| H | 0.929000  | 1.414000  | 1.375000  |
| C | 2.793000  | 2.235000  | 1.866000  |
| O | 2.999000  | 3.329000  | 2.391000  |
| N | 3.585000  | 1.834000  | 0.903000  |
| H | 4.345000  | 2.439000  | 0.619000  |
| H | 3.468000  | 0.915000  | 0.481000  |



|   |           |           |           |
|---|-----------|-----------|-----------|
| H | 0.035000  | 0.852000  | 3.590000  |
| H | 1.510000  | 1.393000  | 4.384000  |
| N | -1.128000 | 4.684000  | -0.601000 |
| H | -1.605000 | 5.501000  | -0.237000 |
| C | 0.205000  | 4.901000  | -1.179000 |
| H | 0.294000  | 5.972000  | -1.366000 |
| C | 1.276000  | 4.570000  | -0.137000 |
| H | 0.965000  | 4.965000  | 0.829000  |
| H | 1.359000  | 3.488000  | -0.047000 |
| C | 2.639000  | 5.160000  | -0.491000 |
| O | 2.894000  | 5.715000  | -1.579000 |
| O | 3.624000  | 5.085000  | 0.282000  |
| C | 0.425000  | 4.213000  | -2.538000 |
| O | 1.187000  | 3.254000  | -2.689000 |
| H | -0.145000 | 4.606000  | -3.380000 |
| H | -1.098000 | 3.991000  | 0.117000  |
| C | 5.000000  | 3.223000  | -7.347000 |
| H | 5.567000  | 3.851000  | -8.026000 |
| C | 5.895000  | 2.243000  | -6.584000 |
| H | 5.246000  | 1.567000  | -6.024000 |
| H | 6.454000  | 1.646000  | -7.305000 |
| C | 6.899000  | 2.842000  | -5.619000 |
| C | 7.452000  | 4.128000  | -5.796000 |
| H | 7.145000  | 4.760000  | -6.614000 |
| C | 8.404000  | 4.618000  | -4.884000 |
| H | 8.821000  | 5.608000  | -5.009000 |
| C | 8.789000  | 3.839000  | -3.781000 |
| H | 9.514000  | 4.221000  | -3.076000 |
| C | 8.218000  | 2.571000  | -3.593000 |
| H | 8.472000  | 1.967000  | -2.738000 |
| C | 7.308000  | 2.062000  | -4.528000 |
| H | 6.927000  | 1.060000  | -4.410000 |
| H | 4.276000  | 2.676000  | -7.941000 |
| H | 4.456000  | 3.871000  | -6.667000 |
| H | 13.122000 | 0.725000  | -6.678000 |
| N | 12.203000 | 0.495000  | -6.998000 |
| H | 12.198000 | -0.499000 | -7.182000 |
| C | 11.190000 | 0.988000  | -6.072000 |
| H | 11.663000 | 1.687000  | -5.382000 |
| C | 10.121000 | 1.756000  | -6.866000 |
| H | 9.350000  | 2.104000  | -6.184000 |
| H | 10.584000 | 2.634000  | -7.316000 |
| S | 9.374000  | 0.734000  | -8.172000 |
| H | 10.529000 | 0.314000  | -8.713000 |
| C | 10.595000 | -0.158000 | -5.230000 |
| O | 10.660000 | -1.332000 | -5.607000 |
| N | 10.015000 | 0.190000  | -4.083000 |
| H | 10.036000 | 1.174000  | -3.844000 |
| C | 9.469000  | -0.713000 | -3.062000 |
| H | 8.387000  | -0.599000 | -3.025000 |
| H | 9.700000  | -1.749000 | -3.300000 |
| C | 10.011000 | -0.385000 | -1.670000 |
| O | 10.524000 | 0.711000  | -1.446000 |
| N | 9.916000  | -1.326000 | -0.732000 |
| H | 9.472000  | -2.203000 | -0.999000 |
| C | 10.475000 | -1.210000 | 0.629000  |
| H | 11.061000 | -0.297000 | 0.683000  |
| C | 9.341000  | -1.064000 | 1.654000  |
| H | 8.671000  | -1.922000 | 1.598000  |
| C | 9.851000  | -0.916000 | 3.088000  |

|   |           |           |           |
|---|-----------|-----------|-----------|
| H | 10.496000 | -0.041000 | 3.164000  |
| H | 9.005000  | -0.788000 | 3.763000  |
| H | 10.397000 | -1.809000 | 3.395000  |
| O | 8.627000  | 0.126000  | 1.384000  |
| H | 7.908000  | -0.086000 | 0.747000  |
| C | 11.389000 | -2.416000 | 0.920000  |
| O | 10.984000 | -3.538000 | 0.616000  |
| H | 12.361000 | -2.281000 | 1.393000  |
| N | 10.082000 | 3.980000  | 1.978000  |
| H | 9.173000  | 4.389000  | 2.110000  |
| C | 10.312000 | 3.325000  | 0.684000  |
| H | 10.370000 | 2.249000  | 0.848000  |
| C | 9.099000  | 3.626000  | -0.194000 |
| H | 9.086000  | 4.675000  | -0.521000 |
| H | 9.090000  | 2.969000  | -1.067000 |
| O | 7.840000  | 3.420000  | 0.484000  |
| H | 7.221000  | 2.783000  | -0.048000 |
| C | 11.599000 | 3.790000  | -0.025000 |
| O | 12.044000 | 4.929000  | 0.155000  |
| H | 12.083000 | 3.098000  | -0.713000 |
| H | 10.272000 | 3.371000  | 2.744000  |
| M | 4.761000  | 5.925000  | -1.195000 |
| M | 4.011000  | 5.141000  | 2.204000  |
| O | 5.798000  | 4.175000  | 1.783000  |
| P | 6.803000  | 5.161000  | 1.111000  |
| O | 6.541000  | 5.580000  | -0.325000 |
| O | 7.914000  | 5.747000  | 1.912000  |
| O | 5.243000  | 6.737000  | 1.797000  |
| P | 4.899000  | 8.080000  | 1.056000  |
| O | 5.875000  | 9.207000  | 1.239000  |
| O | 4.451000  | 7.764000  | -0.399000 |
| O | 3.478000  | 8.562000  | 1.833000  |
| P | 2.114000  | 7.708000  | 2.087000  |
| O | 1.152000  | 7.875000  | 0.947000  |
| O | 2.431000  | 6.277000  | 2.527000  |
| O | 1.516000  | 8.503000  | 3.372000  |
| C | 2.275000  | 8.509000  | 4.611000  |
| H | 2.533000  | 9.573000  | 4.762000  |
| H | 3.203000  | 7.943000  | 4.453000  |
| H | 1.685000  | 8.102000  | 5.445000  |
| H | 13.308000 | 2.317000  | 5.190000  |
| H | 12.921000 | 2.118000  | 3.794000  |
| O | 13.318000 | 1.588000  | 4.522000  |
| H | -1.801000 | 7.494000  | 0.436000  |
| H | -0.337000 | 7.833000  | 0.272000  |
| O | -1.189000 | 7.822000  | -0.236000 |
| H | 5.400000  | 11.651000 | -6.003000 |
| H | 5.277000  | 10.184000 | -5.908000 |
| O | 5.576000  | 10.938000 | -5.362000 |
| H | 3.464000  | 9.357000  | -4.077000 |
| H | 4.792000  | 10.017000 | -3.911000 |
| O | 4.250000  | 9.329000  | -3.476000 |
| H | 7.110000  | 5.100000  | 6.269000  |
| H | 7.231000  | 3.726000  | 5.713000  |
| O | 6.604000  | 4.468000  | 5.709000  |
| H | 6.400000  | -1.823000 | 0.168000  |
| H | 5.897000  | -3.181000 | 0.656000  |
| O | 6.612000  | -2.785000 | 0.129000  |
| H | 5.833000  | 6.861000  | -3.680000 |
| H | 4.955000  | 7.784000  | -2.936000 |

|   |           |          |           |
|---|-----------|----------|-----------|
| O | 5.291000  | 6.851000 | -2.854000 |
| H | 4.630000  | 3.604000 | -2.775000 |
| H | 5.558000  | 3.310000 | -1.649000 |
| O | 5.051000  | 4.081000 | -2.025000 |
| H | 3.785000  | 5.287000 | 4.884000  |
| H | 5.224000  | 4.901000 | 4.696000  |
| O | 4.404000  | 5.062000 | 4.165000  |
| H | 14.234000 | 6.863000 | -1.023000 |
| H | 13.431000 | 6.011000 | -0.083000 |
| O | 14.211000 | 6.603000 | -0.080000 |
